# Supplementary material for: Synthesis of yellow mesoporous Ni-doped TiO2 with enhanced photoelectrochemical performance under visible light
Source: Royal Society of Chemistry journal article supplement (doi:10.1039/c6qi00609d), 2017-01-01
Supplement: c6qi00609d1.pdf [file c6qi00609d1.pdf]

## **Synthesis of yellow mesoporous Ni-doped TiO<sub>2</sub> with enhanced photoelectrochemical performance under visible light**

Bin Gao, Tao Wang\*, Xiaoli Fan, Hao Gong, Hu Guo, Wei Xia, Yaya Feng, Xianli Huang, Jianping He\*

College of Materials Science and Technology, Jiangsu Key Laboratory of Materials and Technology for Energy Conversion, Nanjing University of Aeronautics and Astronautics, 210016 Nanjing, PR China.

E-mail address: wangtao0729@nuaa.edu.cn, jianph@nuaa.edu.cn;

Tel: +86 25 52112906; Fax: +86 25 52112626.

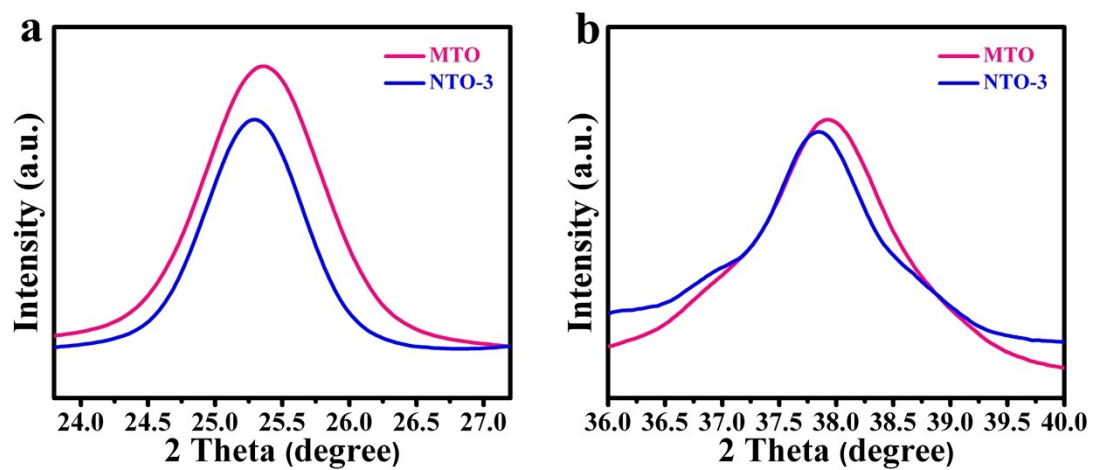

Figure S1. Enlarged XRD patterns of MTO and NTO-3.

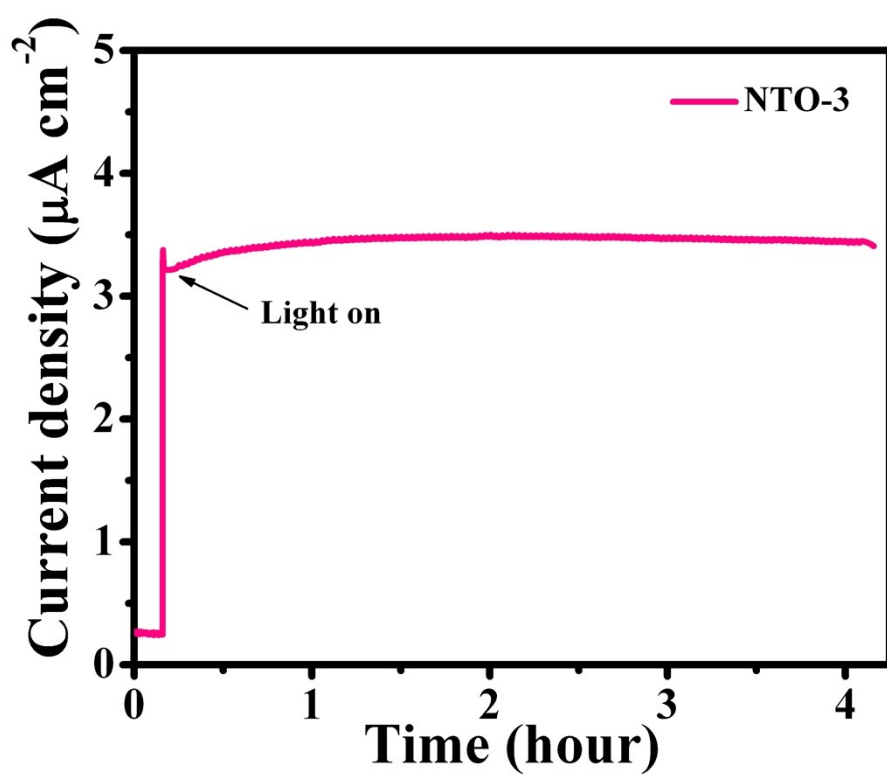

Figure S2.  $i-t$  curves at 1.3 V (vs. RHE) in 1 M NaOH under visible light illumination.

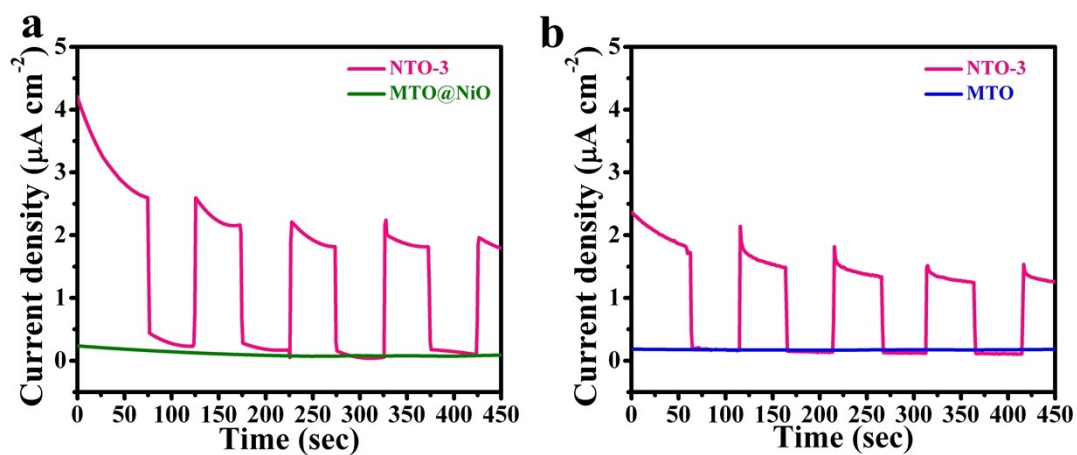

Figure S3. The photocurrent responses under visible light at 1.3 V (vs.RHE) of NTO-3, MTO and MTO@NiO in (a) 0.5 M  $\text{Na}_2\text{SO}_4$  and (b) 0.5M  $\text{Na}_2\text{SO}_4$  containing 0.2 M  $\text{NiSO}_4$ . MTO@NiO was prepared by calcining the mixed grinding powder of MTO and NiO (the molar ratio of Ni/Ti was 0.01) at 400 °C.

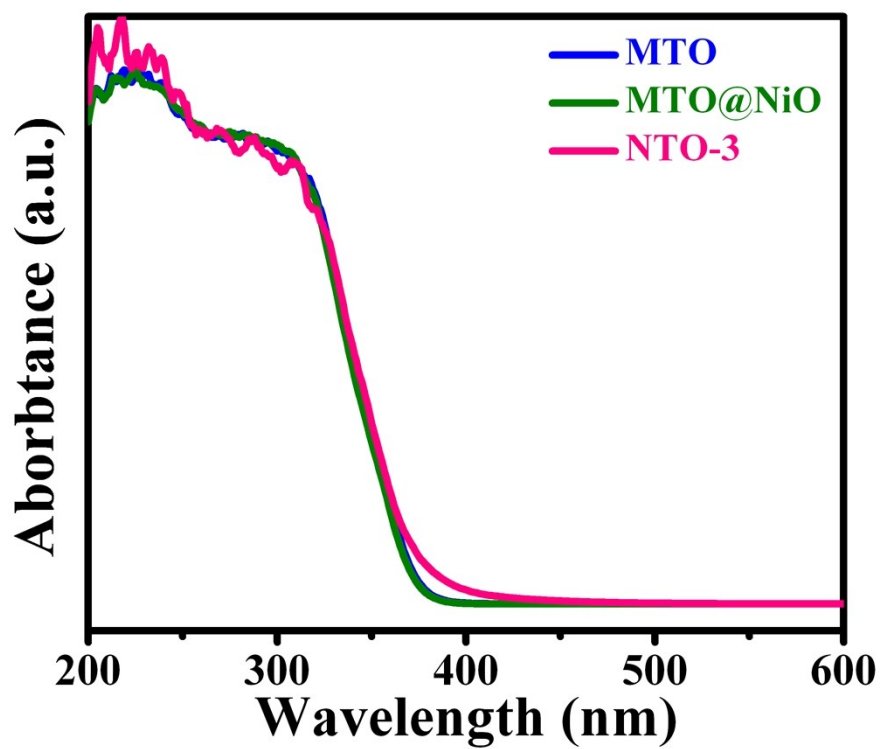

Figure S4. UV-vis absorption spectra of MTO, MTO@NiO and NTO-3.
